# Supplementary material for: Single cell and bulk RNA expression analyses identify enhanced hexosamine biosynthetic pathway and O-GlcNAcylation in acute myeloid leukemia blasts and stem cells
Source: PubMed Central journal article supplement (PMC11004450; doi:10.3389/fimmu.2024.1327405), 2024-03-27

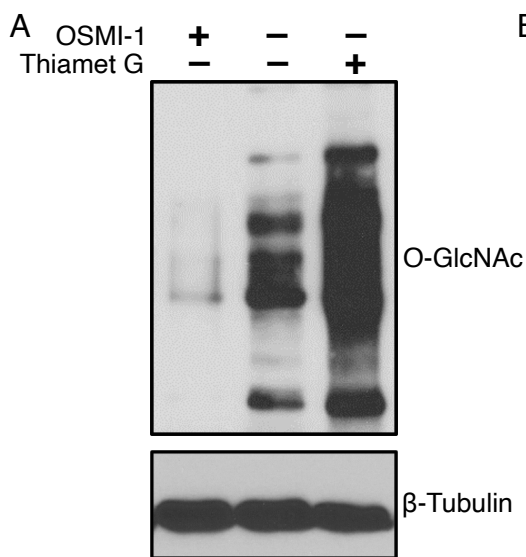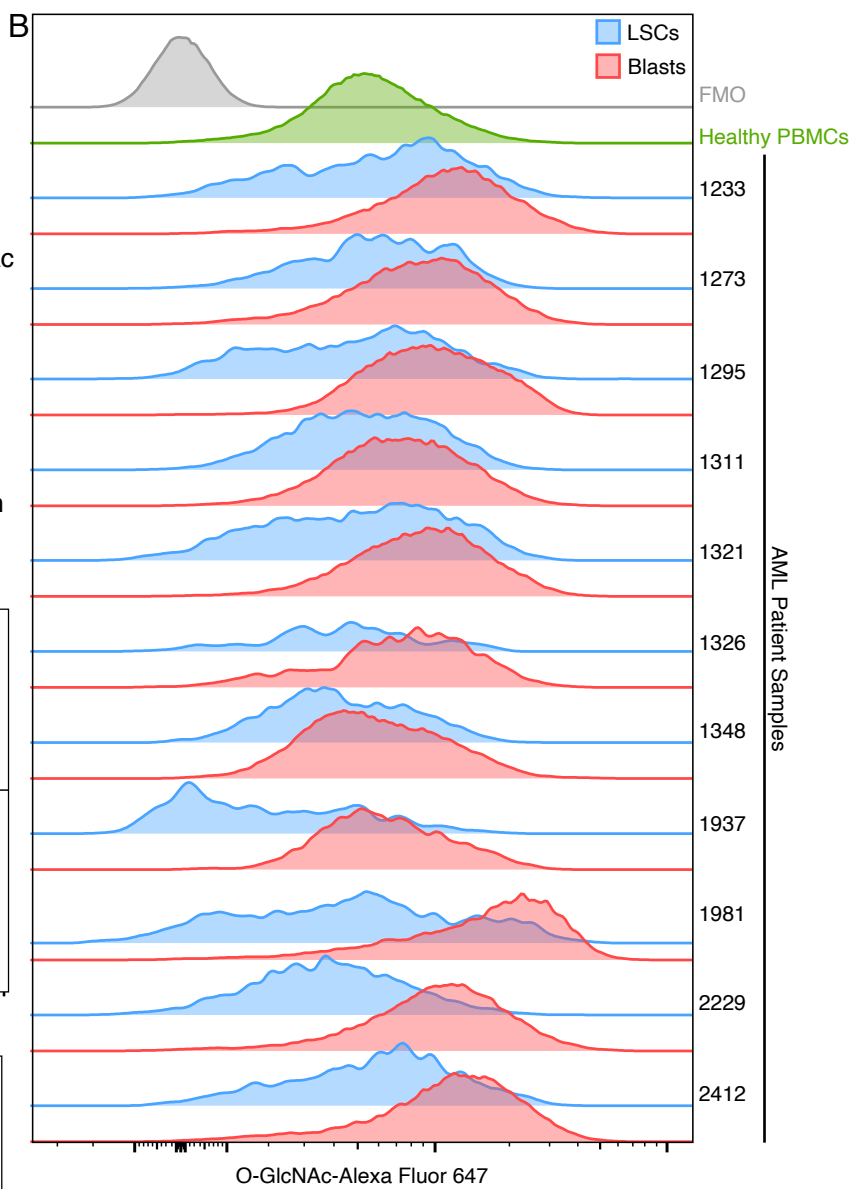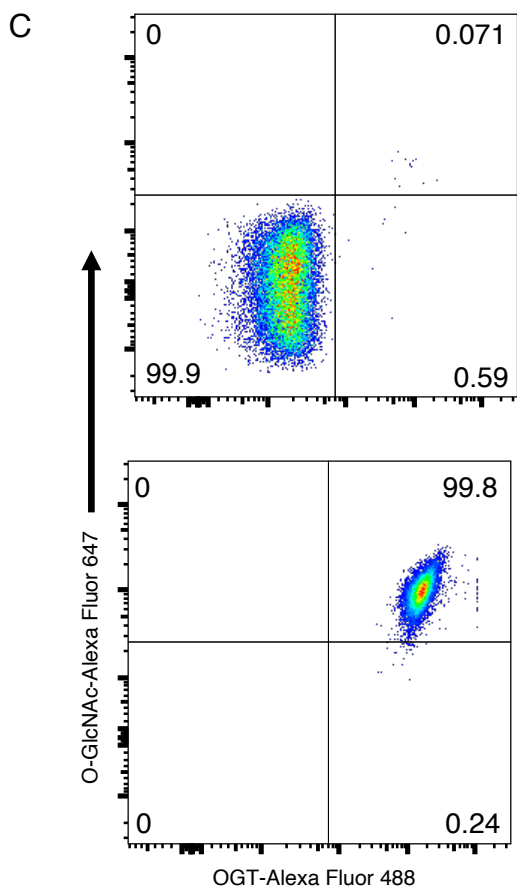

Supplement: DataSheet_2.pdf [file DataSheet_2.pdf]
